# Supplementary material
Source: Elsevier journal article supplement (https://www.sciencedirect.com/science/article/pii/S0187533718300839)
Supplement: mmc1 [file S0187533718300839:mmc1.pdf]

## ANEXO 1

### ENCUESTA SOBRE VACUNACIÓN EN EL EMBRAZO

Folio: \_\_\_\_\_

Este cuestionario forma parte de un estudio realizado en el servicio de Medicina Materno Fetal del Instituto Nacional de Perinatología para evaluar el conocimiento de médicos residentes en Ginecoobstetricia y Gineco-obstetras sobre Vacunas y embarazo, así como la práctica clínica habitual. La información recabada se manejará de manera confidencial. Tiempo estimado de llenado 5 minutos.

**Coloque una marca con una cruz (X) en la opción de respuesta deseada. PUEDE MARCAR MAS DE UNA OPCIÓN POR PREGUNTA.**

Institución donde labora actualmente:

- ( ) Pública.
- ( ) Privada.
- ( ) Ambas.

Nivel de atención en el que labora:

- ( ) Primer nivel.
- ( ) Segundo nivel.
- ( ) Tercer nivel.

Nivel académico

Residente ----- Especifique que año cursa -----

Gineco- obstetra -----

Tiempo de ejercicio como Gineco-obstetra:

- ( ) Menos de 5 años.
- ( ) De 5 a 10 años.
- ( ) Más de 10 años.

¿Cuenta con una subespecialidad?

- ( ) No.
- ( ) Si.Cuál? \_\_\_\_\_.

**Coloque una marca con una cruz (X) en la opción de respuesta que usted crea sea la correcta. SOLO MARQUE UNA OPCIÓN POR CADA PREGUNTA.**

1. Con relación a la vacunación durante el embarazo la siguiente aseveración es verdadera:
  - a. ( ) Vacuna es toda sustancia destinada a generar inmunidad contra una enfermedad estimulando la producción de anticuerpos.
  - b. ( ) Las vacunas son anticuerpos que generan inmunidad en la embarazada
  - c. ( ) Las vacunas son bacterias y virus atenuados que no generan daño ni a la embarazada ni al feto
  - d. ( ) No sé
2. Sobre la vacunación durante el embarazo es correcto lo siguiente:
  - a. ( ) Las vacunas inactivas toxoides virales y bacterianas son inocuas para el binomio y deben de administrarse según la cartilla de vacunación en la embarazada.

- b. ☐ Las vacunas de virus atenuados están contraindicadas en el embarazo y su administración es una indicación absoluta para la finalización del embarazo ya que produce anomalías graves en el feto.
  - c. ☐ Las vacunas de virus vivos nunca debe de administrarse a la embarazada
  - d. ☐ No sé
3. Sobre la vacuna DT( toxoide diftérico y tetánico ) se menciona lo siguiente:
- a. ☐ La vacuna DT esta contraindicada en el embarazo por estar elaborada de bacterias vivas
  - b. ☐ La vacuna DT se administra únicamente en tercer trimestre del embarazo de forma segura sin tomar en consideración el tiempo transcurrido desde que recibió su ultimo refuerzo.
  - c. ☐ En nuestro medio la vacunación para la embarazada es la DT( toxoide diftérico y tetánico )
  - d. ☐ No sé
4. La vacuna de la Influenza:
- a. ☐ Está recomendada en toda mujer embarazada al momento de presentarse un brote de influenza , por ser un grupo de población susceptible y su administración debe de ser la vía nasal por ser más fácil .
  - b. ☐ La vacuna de la influenza en el primer trimestre está contraindicada por causar teratogenicidad .
  - c. ☐ La vacuna de la influenza está indicada independientemente de la edad gestacional y su aplicación se debe hacer no solo en epidemias.
  - d. ☐ No sé
5. En cuanto a la vacuna de la hepatitis B :
- a. ☐ La normativa mexicana menciona que es efectiva y previene el 80 a 100 % de infección por hepatitis B en las embarazadas que reciben la dosis completa.
  - b. ☐ Está contraindicada en el embarazo y la lactancia.
  - c. ☐ Se recomienda su uso únicamente en el tercer trimestre y en aquellas embarazadas con alto riesgo de contraer infección por hepatitis B.
  - d. ☐ No sé
6. La fiebre amarilla se caracteriza por ser una enfermedad febril grave con una letalidad del 50 % por eso:
- a. ☐ Se recomienda vacunar a toda persona que viaje a un área endémica especialmente a las embarazadas por pertenecer a un grupo de población susceptible.
  - b. ☐ Se aconseja a la embarazada no viajar a sitios endémicos , dado que la vacuna contra la fiebre amarilla está contraindicada en el embarazo.
  - c. ☐ La vacuna de la fiebre amarilla nunca debe de administrarse dado que esta constituida de virus vivos que atraviesan la barrera placentaria y se asocia a una mayor tasa de abortos espontáneos.
  - d. ☐ No sé
7. Si una mujer embarazada es mordida por un perro callejero, se aconseja lo siguiente en cuanto a la administración de la vacuna contra la rabia:
- a. ☐ Reportar el caso a vigilancia epidemiológica de su unidad de salud más cercana , mantenerse en estrecha vigilancia ante la aparición de algún síntoma y no vacunarse contra la rabia sino hasta los 60 días de puerperio .
  - b. ☐ El embarazo es una contraindicación para la profilaxis post exposición.
  - c. ☐ Se recomienda la aplicación de forma segura de la vacuna antirrábica en mujeres embarazadas expuestas al virus de la rabia, por tratarse de virus muertos.
  - d. ☐ No sé

8. En cuanto a la prevención del **Síndrome de rubeola congénita**:
- ☐ Todo medico debe de revisar la cartilla de vacunación y recomendar la vacunación con MMR a toda mujer en etapa fértil ,independientemente este o no planeando embarazarse.
  - ☐ La vacuna de la rubeola está contraindicada en el embarazo y el aplicársela durante el mismo es una indicación absoluta para finalizar el embarazo.
  - ☐ La vacuna contra la rubeola se recomienda aplicársela al menos 12 semanas antes de quedar embarazada para prevenir el riesgo de aborto y malformaciones fetales .
  - ☐ No sé
9. Si una paciente se aplica la vacuna de la rubeola y entera que tiene 10 semanas de gestación la conducta adecuada sería:
- ☐ Interrumpir el embarazo por el alto riesgo de malformaciones congénitas incompatibles con la vida.
  - ☐ Referir a un tercer nivel para consejería materna y para seguimiento estrecho del feto.
  - ☐ Asegurarle a la embarazada que no hay ninguna posibilidad de riesgo de malformaciones fetales.
  - ☐ No sé.
10. De la vacuna de varicela se recomienda:
- ☐ Vacunar a toda embarazada que este en contacto directo con una persona infectada.
  - ☐ No vacunar ya que es una vacuna de virus vivos y se asocia a atrofia cortical retraso mental y anormalidad en las extremidades del feto.
  - ☐ Vacunar solo si la embarazada está en riesgo de contraer la enfermedad en el primer trimestre.
  - ☐ No sé
11. De la vacunación durante la lactancia se afirma lo siguiente:
- ☐ Ningún tipo de vacunas administradas a las madres lactantes afecta la seguridad de la lactancia , ni para la madre ni para su bebe.
  - ☐ Si una mujer se vacuna contra la rubeola en el periodo de lactancia le trasmitirá anticuerpos necesarios al bebe para protegerlo de la rubeola, por lo que este ya no debe de vacunarse en la infancia.
  - ☐ La vacuna del sarampión es la única vacuna que no puede administrarse en el periodo de lactancia dado que el virus es excretado por la leche materna y el bebe desarrollara la enfermedad.
  - ☐ No sé
12. Toda persona que se vacuna puede desarrollar un efecto secundario a la administración de la misma, por lo tanto todo médico que prescriba una vacuna debe de dar asesoría lo más completa posible a su paciente a cerca de:
- ☐ Las vacunas son inocuas y en su mayoría las reacciones secundarias más frecuentes que se presentan son dolor eritema e hinchazón, ante la presencia de cualquier sintomatología debe de informarlo a su médico.
  - ☐ Las vacunas son inocuas en algunos casos puede presentar fiebre de ser así tomar paracetamol y abundantes líquidos.
  - ☐ En caso de presentar tumoración el sitio de la aplicación de la vacuna se recomienda hielo local y tomar antibióticos. Solo las reacciones sistémicas deben de reportarse por ser graves y de notificación obligatoria.
  - ☐ No sé

13. A cerca de la dosis y vía de administración de las vacunas se menciona lo siguiente :
- ☐ La vacuna de la influenza se administra 0.5 ml vía intramuscular o subcutánea a toda mujer embarazada anual independiente de que haya o no epidemia.
  - ☐ La DT se administra a toda embarazada para protección contra el tétanos y la difteria y la dosis es 1 ml intramuscular en la región deltoidea.
  - ☐ La administración de TDPA es de aplicación única y exclusiva de la infancia de haberse administrado, toda embarazada se aplicara un refuerzo con DT de 0.5 ml en la región deltoidea .
  - ☐ No sé
14. Las vacunas en el embarazo recomendadas por la guía mexicana de Vacunas y embarazo en el 2014 son:
- ☐ TDPA , Influenza y hepatitis B
  - ☐ DT e influenza en epidemias
  - ☐ DT , Influenza y hepatitis A
  - ☐ No sé
15. Una de las siguientes vacunas está contraindicada en el embarazo :
- ☐ Rabia
  - ☐ Hepatitis B
  - ☐ Rubeola
  - ☐ No sé
16. Cuando debe de solicitar la cartilla de vacunación a su paciente embarazada
- ☐ En el primer control prenatal
  - ☐ El segundo trimestre dado que las vacunas están contraindicadas en el primer trimestre.
  - ☐ Siempre, en pacientes que viene de áreas endémicas para una determinada enfermedad.
  - ☐ No sé
